# Supplementary figures and images for: Impact of endothelial lipase on cellular lipid composition
Source: PubMed Central journal article supplement — Biochim Biophys Acta. 2012 Jul;1821(7):1003–11. doi: 10.1016/j.bbalip.2012.03.006 (PMC3460414; doi:10.1016/j.bbalip.2012.03.006), 2012-07

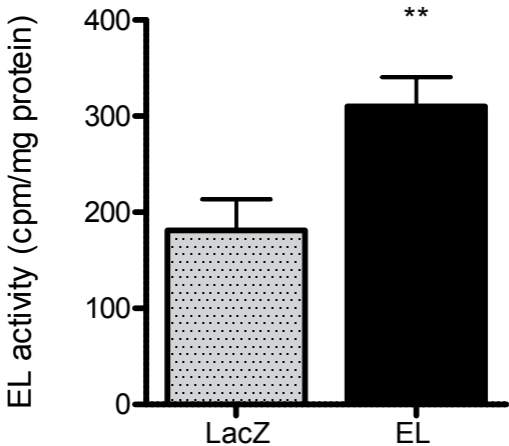

Suppl. Fig. 1A

Supplement: mmc1.pdf [file mmc1.pdf]

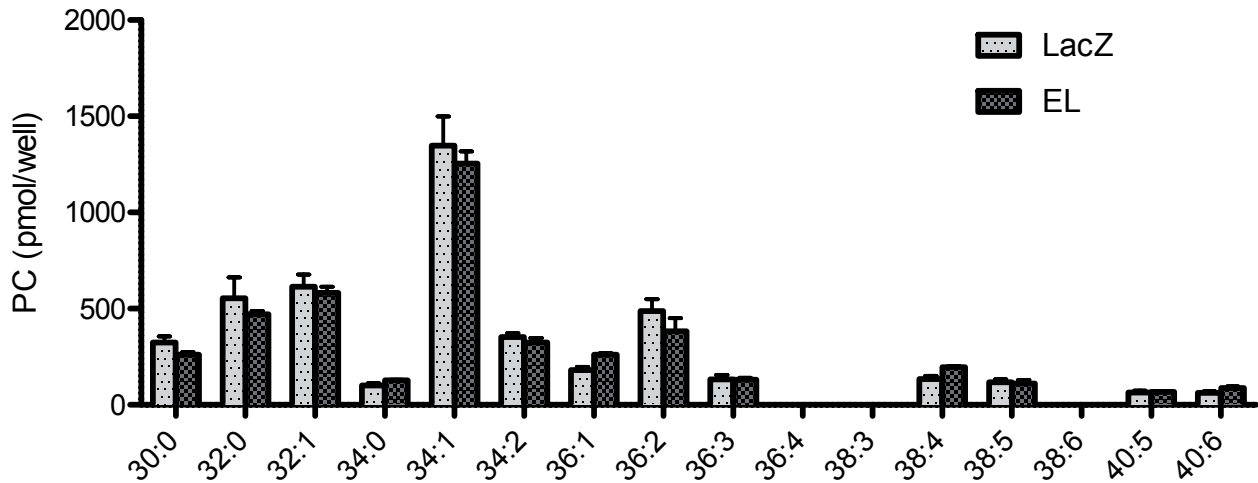

Suppl. Fig. 4B

Supplement: mmc10.pdf [file mmc10.pdf]

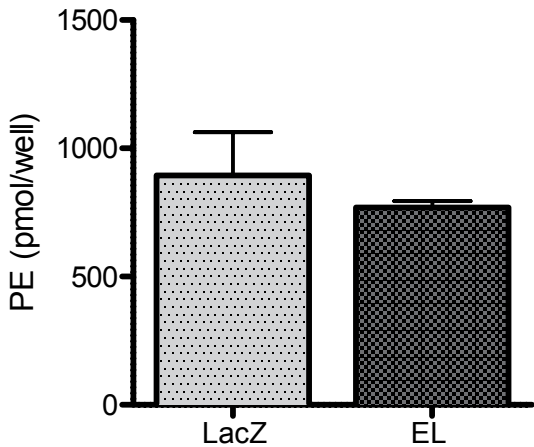

Suppl. Fig. 4C

Supplement: mmc11.pdf [file mmc11.pdf]

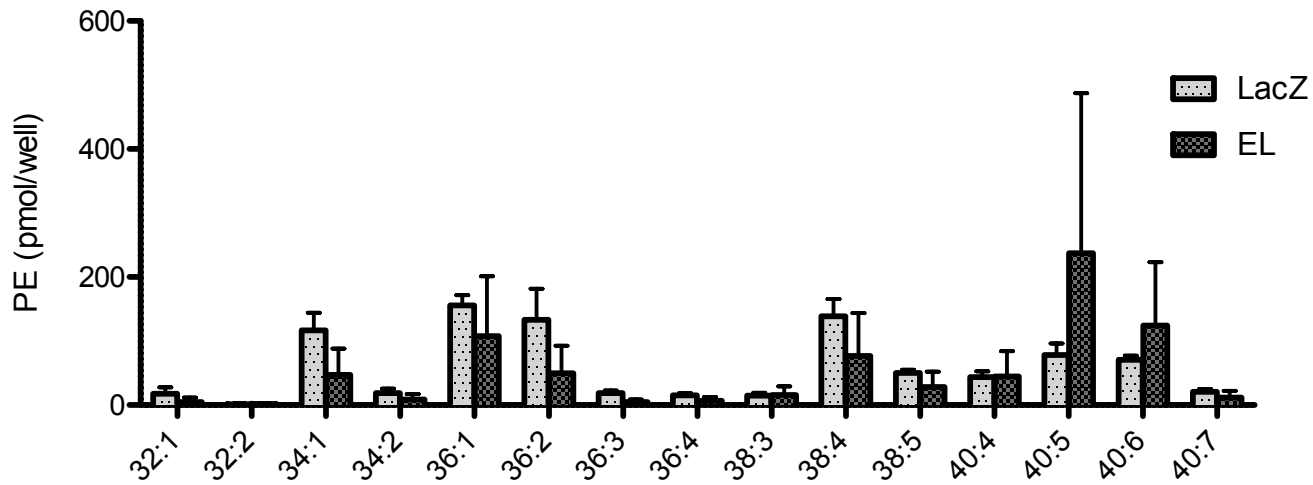

Suppl. Fig. 4D

Supplement: mmc12.pdf [file mmc12.pdf]

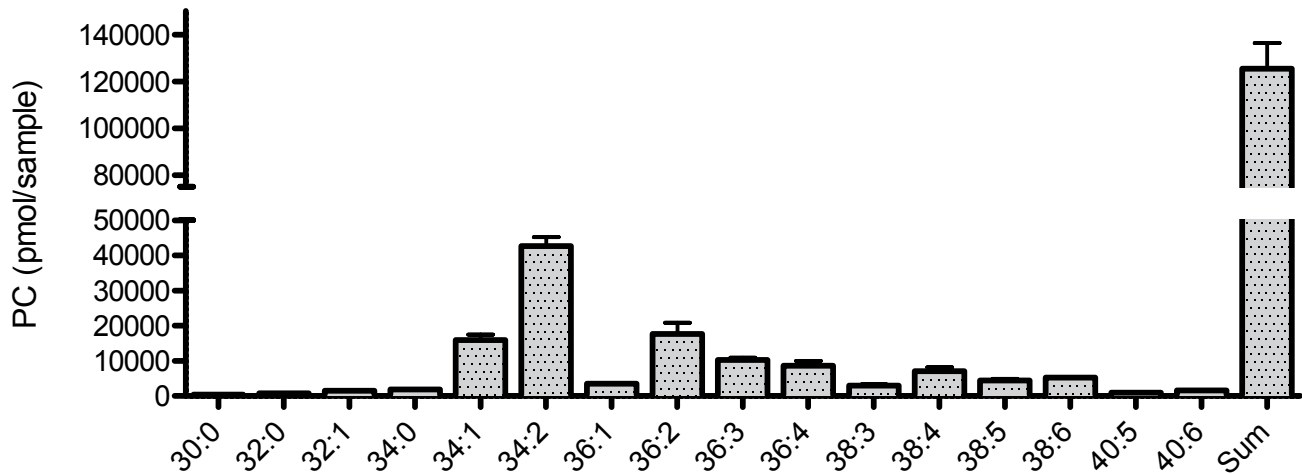

Suppl. Fig. 5A

Supplement: mmc13.pdf [file mmc13.pdf]

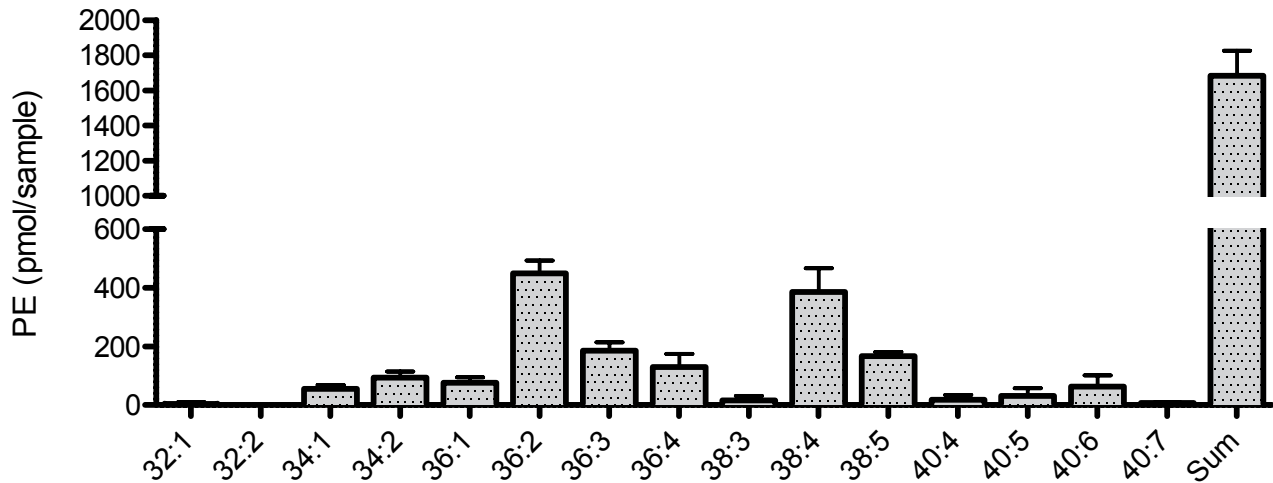

Suppl. Fig. 5B

Supplement: mmc14.pdf [file mmc14.pdf]

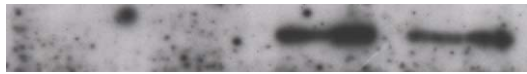

LacZ LacZ EL EL

Suppl. Fig. 1B

Supplement: mmc2.pdf [file mmc2.pdf]

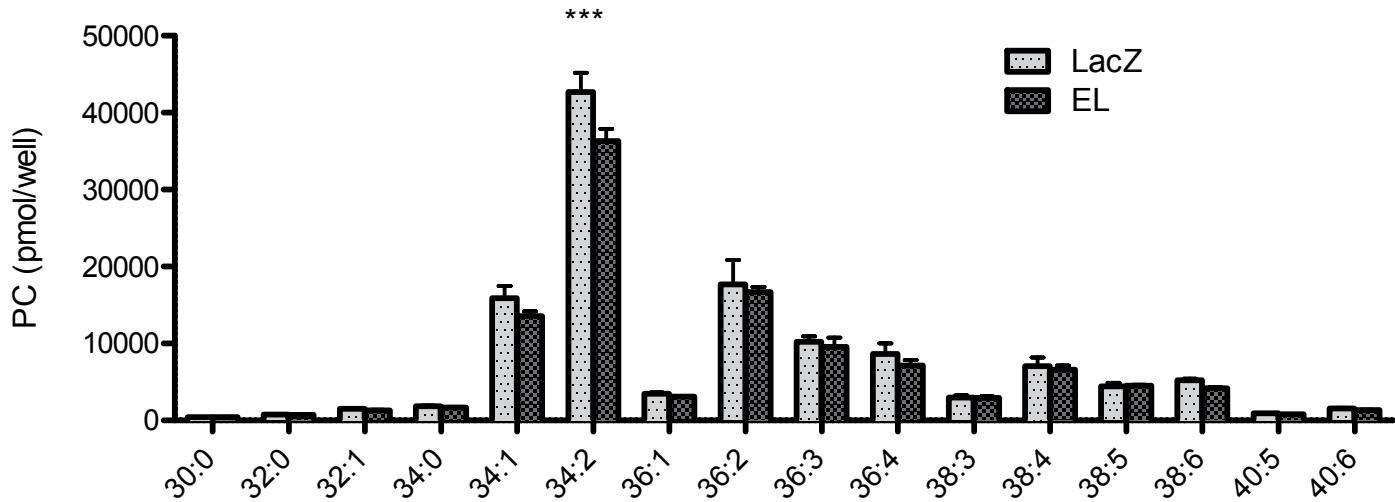

Suppl. Fig. 2A

Supplement: mmc3.pdf [file mmc3.pdf]

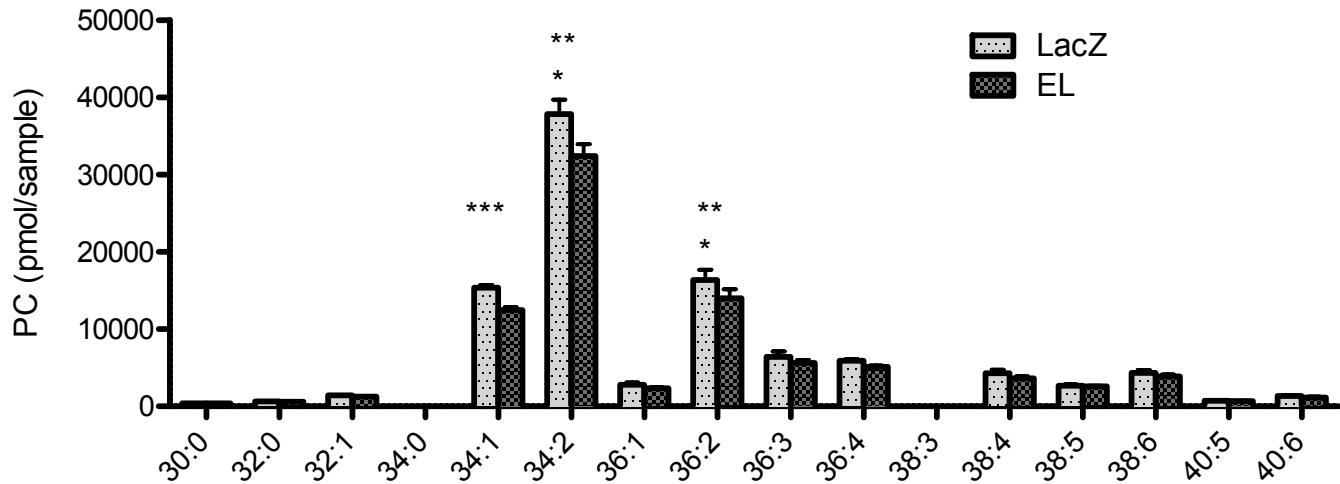

Suppl. Fig. 2B

Supplement: mmc4.pdf [file mmc4.pdf]

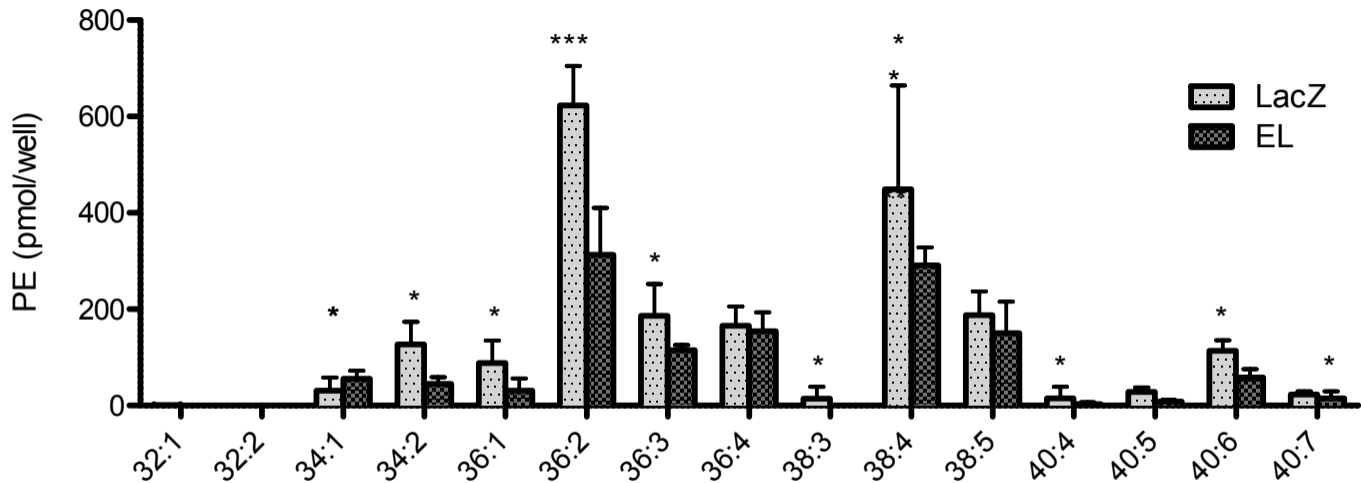

Suppl. Fig. 2C

Supplement: mmc5.pdf [file mmc5.pdf]

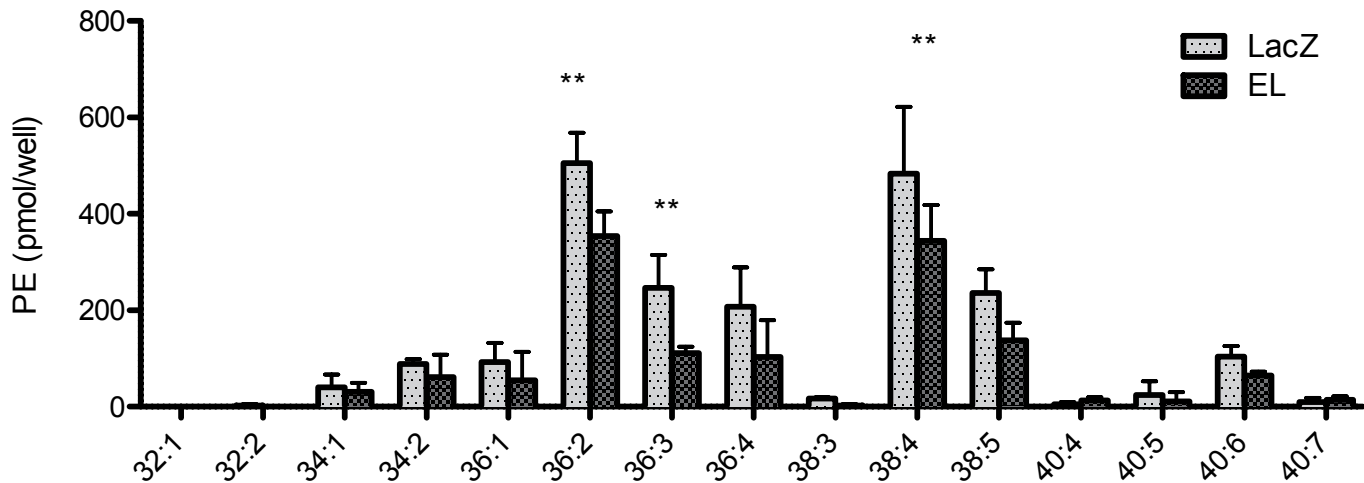

Suppl. Fig. 2D

Supplement: mmc6.pdf [file mmc6.pdf]

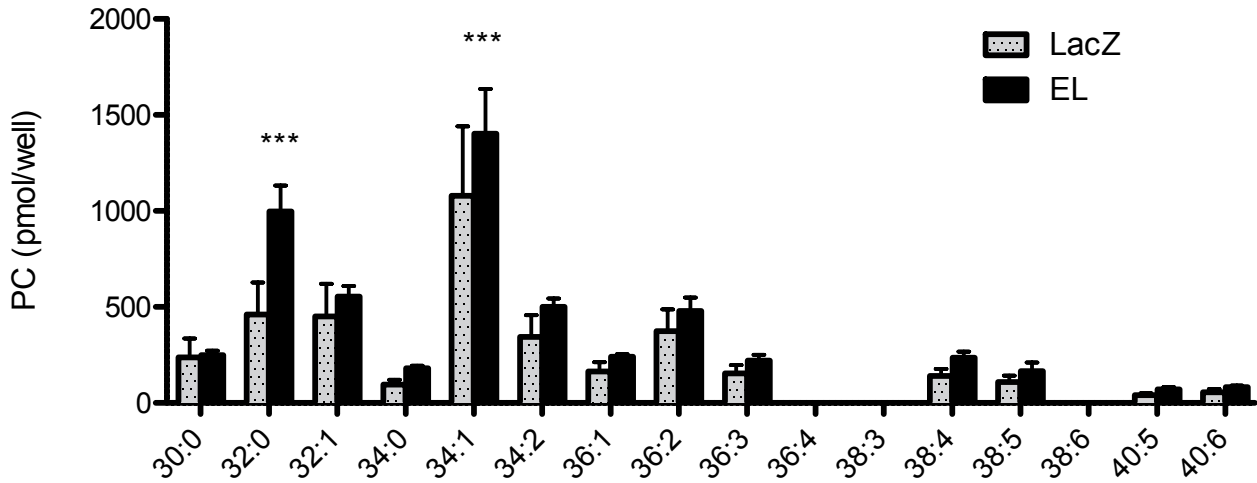

Suppl. Fig. 3A

Supplement: mmc7.pdf [file mmc7.pdf]

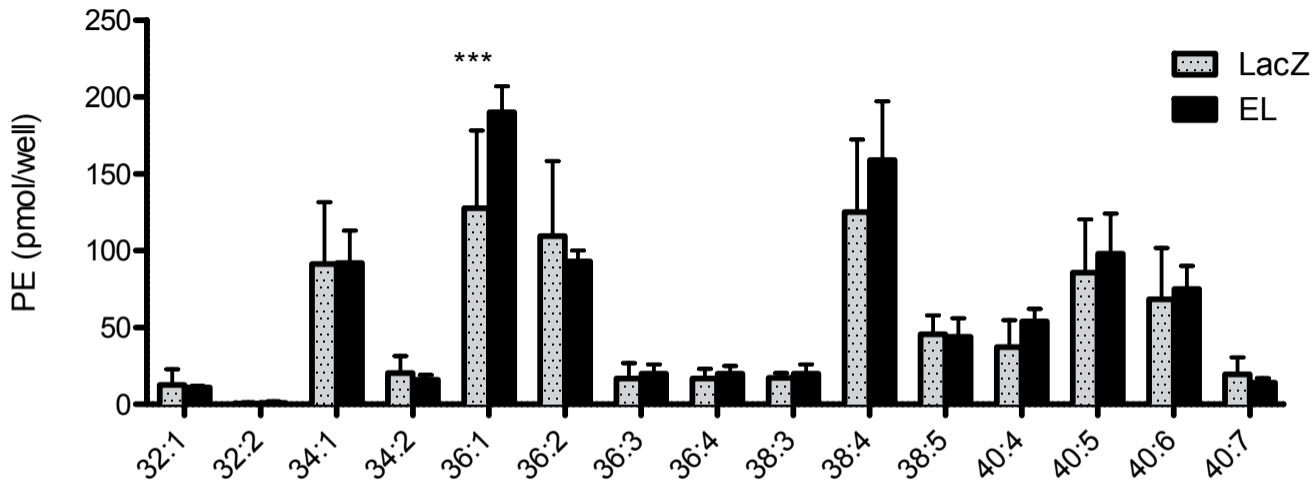

Suppl. Fig. 3B

Supplement: mmc8.pdf [file mmc8.pdf]

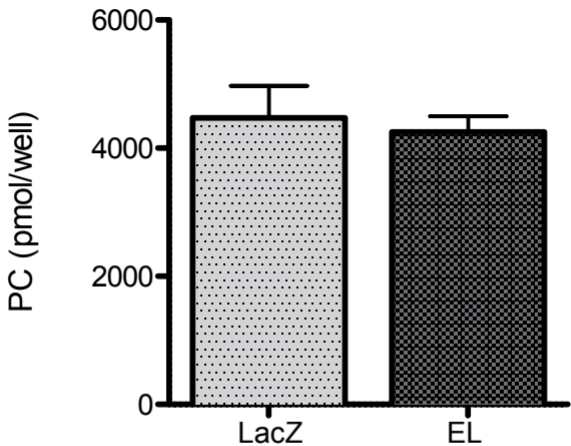

Suppl. Fig. 4A

Supplement: mmc9.pdf [file mmc9.pdf]
